# Supplementary material for: Extracellular matrix powder from cultured cartilage-like tissue as cell carrier for cartilage repair
Source: Royal Society of Chemistry journal article supplement (doi:10.1039/c7tb00640c), 2017-01-01
Supplement: c7tb00640c1.pdf [file c7tb00640c1.pdf]

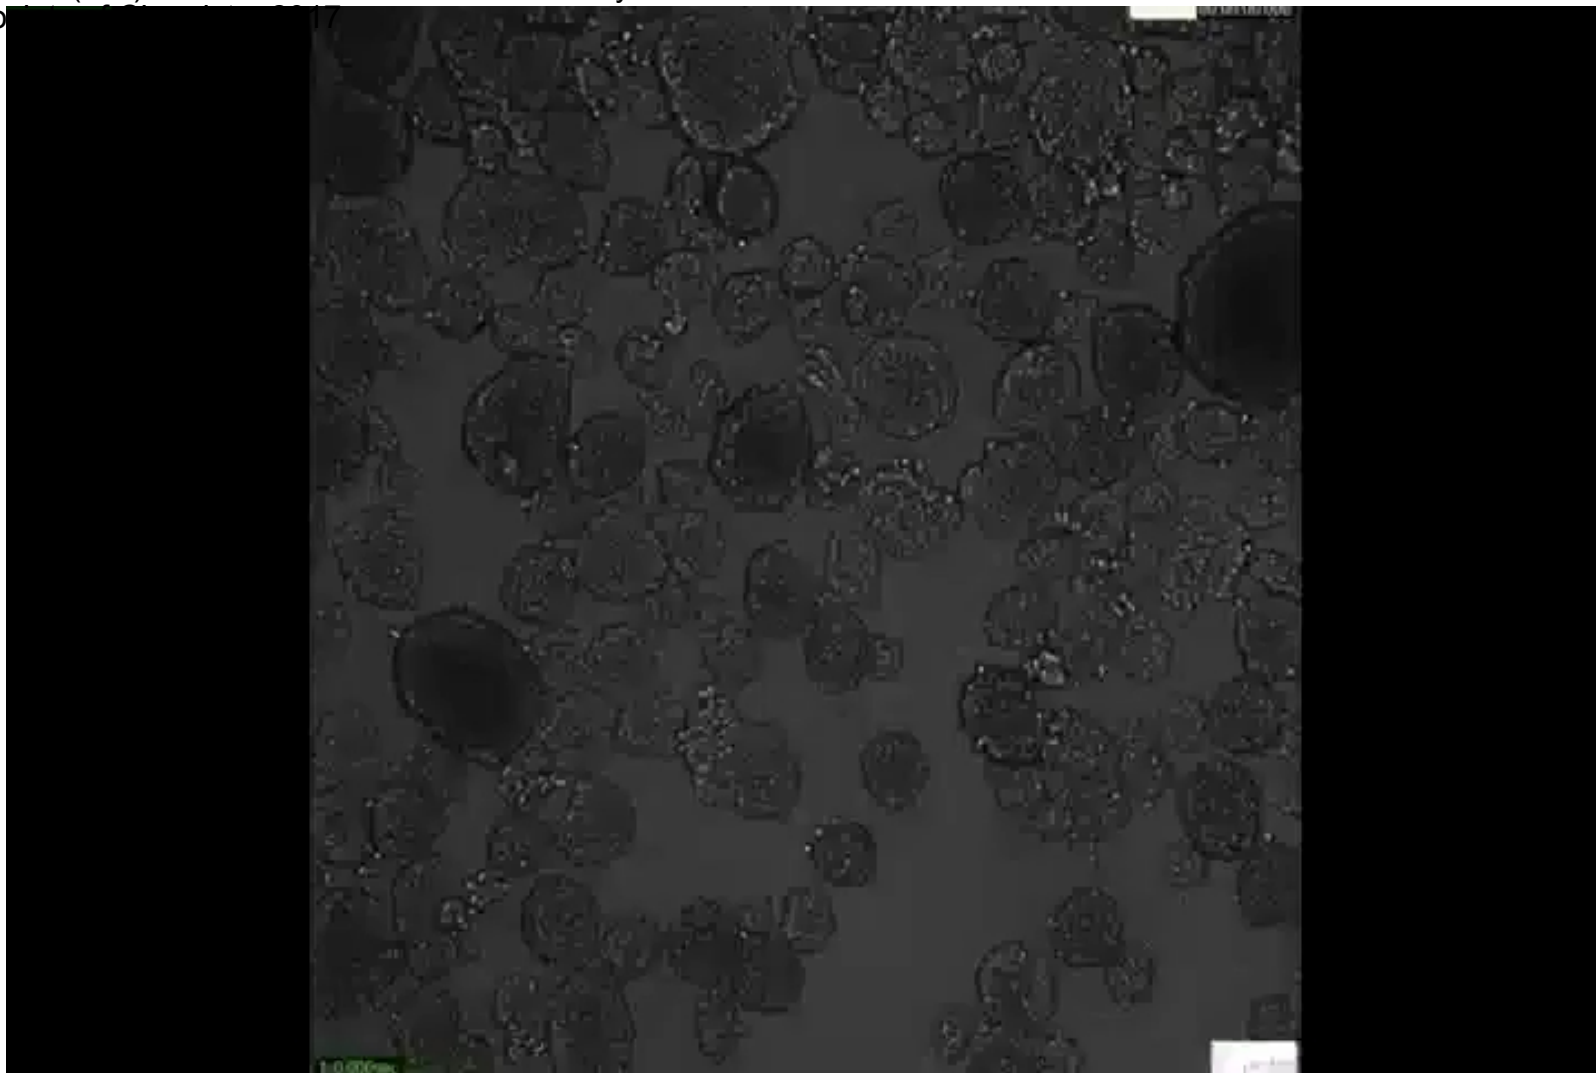

**Video 1.** The chondrocyte microspheroids bridged with each other and formed the “coral-like” cell sheet under a real-time microscope. The video contains four loops of 170-minute self-assembly process of chondrocyte microspheroids. Scale bar, 100  $\mu\text{m}$ .
